# Supplementary material for: Solitary Living Brings a Decreased Weight and an Increased Agility to the Domestic Silkworm, Bombyx mori
Source: Insects. 2021 Sep 9;12(9):809. doi: 10.3390/insects12090809 (PMC8470633; doi:10.3390/insects12090809)
Supplement: Supplementary file 1 [file insects-12-00809-s001.zip › Supplementary Files/Supplemental Tables.xls]

## Sheet: S1
Table S1. The ratios of molted silkworms at a time point at the molting stage after the 4th instar and before the 5th instar.
Sample	Molted/All
Group-living	30/30
Group-living	29/30
Group-living	59/60
Solitary	30/60
Solitary	15/65

## Sheet: S2
Table S2. A test on the selection bias of silkworms to odors. The odors are mixed with the odor of mulberry in experiments. For a pair of compared odors X and Y, Results are the comparison of the numbers of silkworms having made a selection, X or Y.
a pair of compared odors	Results
4-methylcyclohexanol vs 3-Octanol	1:9
Acetic acid vs Alcohol	2:10
Alcohol vs 3-Octanol	4:7
4-methylcyclohexanol vs Acetic acid	6:5

## Sheet: S3
Table S3. The comparison of the counts of behaviors between solitary and group-living silkworms in the experiment to test memory strength. 'Reward' denotes the number of silkworms ultimately arriving at rewards. 'Punishment' denotes the number of silkworms ultimately arriving at punishment. 'No movement' denotes the number of silkworms staying still over 20 minutes. 'Punishment to Reward' denotes…
Tests	Behavior	Solitary-breeding			Group-breeding
		Round 1	Round 2	Round 3	Round 1	Round 2	Round 3
Test 1	Reward	13	14	14	10	7	11
	Punishment	15	11	8	16	15	6
	No movement	1	5	7	1	6	12
	Punishment to Reward	1	0	1	3	2	1
Test 2	Reward	9	15	17	7	12	13
	Punishment	15	10	9	16	14	11
	No movement	3	4	4	6	4	6
	Punishment to Reward	3	1	0	1	0	0
Test 3	Reward	8	14	13	6	12	10
	Punishment	14	9	11	20	14	14
	No movement	1	4	5	1	1	6
	Punishment to Reward	7	3	1	3	3	0
Test 4	Reward	19	4	4	25	4	8
	Punishment	41	30	20	31	20	10
	No movement	7	9	5	16	8	2
	Punishment to Reward	3	1	2	1	0	0

## Sheet: S4
Table S4. The analysis results based on the data in Table S3. 'R' is the shortening of round. 'Rx-Ry' denotes the comparison between Round x and Round y, e.g. 'R2-R1' denotes a comparison between the experimental results in Round 2 and Round 1.'Punishment' here follow that in Table S3. 'Loss' is the decreased count of Punishment in Rx compared to that in Ry. 'Loss/Punishment' is the ratio between…
Tests	Comparisons	Solitary-breeding			Group-breeding			P-value of chi-square test
		Punishment	Loss	Loss/Punishment	Punishment	Loss	Loss/Punishment
Test 1	R2-R1	14	4	0.285714	9	1	0.111111	0.4184
	R3-R2	15	3	0.2	12	9	0.75	0.07729
	R3-R1	15	7	0.466667	12	10	0.833333	0.353
Test 2	R2-R1	16	5	0.3125	12	2	0.166667	0.4902
	R3-R2	17	1	0.0588235	13	3	0.230769	0.2333
	R3-R1	17	6	0.352941	13	5	0.384615	0.9035
Test 3	R2-R1	17	5	0.294118	15	6	0.4	0.6606
	R3-R2	14	-2	-0.142857	10	0	0	-
	R3-R1	14	3	0.214286	10	6	0.6	0.2006
Test 4	R2-R1	5	11	2.2	4	11	2.75	0.7787
	R3-R2	6	10	1.66667	8	10	1.25	0.6813
	R3-R1	6	21	3.5	8	21	2.625	0.6432

## Sheet: S5
Table S5. DEGs between solitary and group-living silkworms in the brain.
Gene	Solitary	Group-living	LogFC	P-value	Adjusted P-value	Regulation	Function	Location	Signal pepetide	Transmembrane	miRNA
KWMTBOMO06689	272.939	57.4077	-2.24926	5e-05	0.0266589	Up	cuticular_protein_hypothetical_15_precursor_[Bombyx_mori]	PlasmaMembrane	Y	Y	NA
KWMTBOMO06690	585.654	150.958	-1.9559	5e-05	0.0266589	Up	cuticular_protein_hypothetical_14_precursor_[Bombyx_mori]	PlasmaMembrane	Y	Y	NA
KWMTBOMO06697	251.81	16.474	-3.93407	5e-05	0.0266589	Up	cuticular_protein_hypothetical_8_precursor_[Bombyx_mori]	PlasmaMembrane	Y	N	NA
KWMTBOMO07068	49.5791	8.61867	-2.5242	5e-05	0.0266589	Up	Lysozymes have primarily a bacteriolytic function; those in tissues and body fluids are associated with the monocyte-macrophage system and enhance the activity of immunoagents.	Extracellular	Y	N	NA
KWMTBOMO09652	129.682	38.122	-1.76628	5e-05	0.0266589	Up	PREDICTED:_peptidoglycan-recognition_protein_LB-like_[Bombyx_mori]	Extracellular	Y	N	NA
KWMTBOMO09387	74.4273	10.5138	-2.82354	5e-05	0.0266589	Up	Nuclease that cleaves 2',3'-cGAMP.	Mitochondrial	N	N	bmomiR2835p,Down
KWMTBOMO11223	152.557	26.2908	-2.53672	5e-05	0.0266589	Up	Component of the pupal abdominal endocuticle. May have important role in the pharate pupal cuticle structure.	Extracellular	Y	N	bmomiR263a5p,Up
KWMTBOMO00892	833.731	90.9277	-3.19679	5e-05	0.0266589	Up	cuticular_protein_hypothetical_2_precursor_[Bombyx_mori]	PlasmaMembrane	Y	N	NA
KWMTBOMO13337	49.1009	12.0064	-2.03194	5e-05	0.0266589	Up	cuticular_protein_RR-3_motif_148_precursor_[Bombyx_mori]	Extracellular	Y	N	NA
KWMTBOMO13656	77.166	16.4218	-2.23235	5e-05	0.0266589	Up	PREDICTED:_circadian_clock-controlled_protein-like_[Bombyx_mori]	Cytoplasmic	Y	N	bmomiR27875p,Down
KWMTBOMO13820	399.8	108.108	-1.88681	5e-05	0.0266589	Up	odorant_binding_protein_LOC100301495_precursor_[Bombyx_mori]	Extracellular	Y	N	NA
KWMTBOMO16320	152.201	35.011	-2.12009	5e-05	0.0266589	Up	NA	PlasmaMembrane	N	N	bmomiR2835p,Down
KWMTBOMO00055	2.23362	7.76141	1.79693	5e-05	0.0266589	Down	Structural component of striated muscles which plays a role in myofibrillogenesis. Probably involved in the assembly of myosin into sarcomeric A bands in striated muscle (PubMed:11448995, PubMed:16205939). Has serine/threonine protein kinase activity and phosphorylates N-cadherin CDH2 and sodium/potassium-transporting ATPase subunit ATP1B1 (By similarity). Binds (via the PH domain) strongly to ph…	Nuclear	N	N	bmomiR9275p,Up;bmomiR2791,Up;bmomiR2835p,Down;bmomiR27875p,Down;bmomiR3001,Down
KWMTBOMO10647	5.04694	58.4872	3.53464	5e-05	0.0266589	Down	serine_protease_[Bombyx_mandarina]	Extracellular	Y	N	NA
KWMTBOMO10719	0	1.20064	inf	5e-05	0.0266589	Down	PREDICTED:_ovochymase-2-like_[Bombyx_mori]	PlasmaMembrane	Y	N	NA
KWMTBOMO11451	61.6632	226.206	1.87516	5e-05	0.0266589	Down	farnesyl_diphosphate_synthase_2_[Bombyx_mori]	Mitochondrial	N	N	NA
KWMTBOMO11452	61.6632	226.206	1.87516	5e-05	0.0266589	Down	farnesyl_diphosphate_synthase_2_[Bombyx_mori]	Cytoplasmic	N	N	NA
KWMTBOMO11732	50.3563	141.276	1.48827	5e-05	0.0266589	Down	PREDICTED:_transcription_factor_jun-D_[Bombyx_mori]	Nuclear	N	N	NA
KWMTBOMO16088	47.2174	140.846	1.57672	5e-05	0.0266589	Down	heat_shock_protein_70_A1_[Bombyx_mori]	Cytoplasmic	N	N	NA
KWMTBOMO16090	47.2174	140.846	1.57672	5e-05	0.0266589	Down	heat_shock_protein_70_[Bombyx_mori]	Cytoplasmic	N	N	NA
KWMTBOMO16091	47.2174	140.846	1.57672	5e-05	0.0266589	Down	heat_shock_protein_70_[Bombyx_mori]	Cytoplasmic	N	N	NA
KWMTBOMO02259	98.2312	356.888	1.86122	5e-05	0.0266589	Down	cuticular_protein_RR-2_motif_65_precursor_[Bombyx_mori]	Extracellular	Y	N	NA
KWMTBOMO01738	5.77916	62.3341	3.43109	5e-05	0.0266589	Down	P:response to symbiotic bacterium	Cytoplasmic	N	N	NA
KWMTBOMO02587	2.36398	68.6918	4.86085	5e-05	0.0266589	Down	PREDICTED:_lipase-1_isoform_X1_[Bombyx_mori]	Extracellular	N	N	NA
KWMTBOMO03298	2.79008	18.0518	2.69376	5e-05	0.0266589	Down	carboxylesterase_clade_H?_member_1_precursor_[Bombyx_mori]	Mitochondrial	Y	N	NA
KWMTBOMO03781	16.8243	71.9828	2.0971	5e-05	0.0266589	Down	PREDICTED:_acyl-CoA_synthetase_short-chain_family_member_3?_mitochondrial_[Amyelois_transitella]	Mitochondrial	N	N	NA
KWMTBOMO03782	16.8243	71.9828	2.0971	5e-05	0.0266589	Down	PREDICTED:_acyl-CoA_synthetase_short-chain_family_member_3?_mitochondrial_[Amyelois_transitella]	Mitochondrial	N	N	NA
Note: 'Location', 'Signal peptides' and 'Transmembrane' are predicted based on SGID. 'miRNA' are potential miRNAs that regulate the expresion of DEGs.

## Sheet: S6
Table S6. DEGs between solitary and group-living silkworms in the midgut.
Gene	Solitary	Group	LogFC	P-value	Adjusted P-value	Regulation	Function	Location	Signal peptides	Transmembrane
KWMTBOMO09738	0.470777	0	inf	5e-05	0.0135622	Up	Optomotor-blind_protein_[Papilio_machaon]	Nuclear	N	N
KWMTBOMO09739	0.470777	0	inf	5e-05	0.0135622	Up	Optomotor-blind_protein_[Habropoda_laboriosa]	Mitochondrial	N	N
KWMTBOMO09740	0.470777	0	inf	5e-05	0.0135622	Up	PREDICTED:_optomotor-blind_protein-like_isoform_X1_[Bombyx_mori]	Nuclear	N	N
KWMTBOMO10634	13.3562	5.96166	-1.16372	0.0001	0.02509	Up	PREDICTED:_sodium-independent_sulfate_anion_transporter-like_[Bombyx_mori]	PlasmaMembrane	N	Y
KWMTBOMO10717	142.523	68.5554	-1.05586	5e-05	0.0135622	Up	PREDICTED:_ovochymase-2-like_[Bombyx_mori]	Extracellular	N	N
KWMTBOMO11849	8.34429	1.37396	-2.60245	5e-05	0.0135622	Up	PREDICTED:_probable_metabolite_transport_protein_CsbC_[Amyelois_transitella]	PlasmaMembrane	N	Y
KWMTBOMO11850	8.34429	1.37396	-2.60245	5e-05	0.0135622	Up	putative_sugar_transporter_[Danaus_plexippus]	PlasmaMembrane	N	Y
KWMTBOMO13391	15.86	4.38679	-1.85415	5e-05	0.0135622	Up	PREDICTED:_proton-coupled_folate_transporter-like_[Papilio_machaon]	PlasmaMembrane	N	Y
KWMTBOMO16111	10.0201	3.99881	-1.32525	5e-05	0.0135622	Up	PREDICTED:_facilitated_trehalose_transporter_Tret1-like_[Bombyx_mori]	PlasmaMembrane	N	Y
KWMTBOMO01268	406.127	59.6547	-2.76722	5e-05	0.0135622	Up	NA	Extracellular	Y	N
KWMTBOMO02599	227.699	95.3622	-1.25564	5e-05	0.0135622	Up	antennal_binding_protein_precursor_[Bombyx_mori]	Extracellular	Y	N
KWMTBOMO06299	18.7755	35.1254	0.903668	0.0002	0.0477905	Down	hypothetical_protein_NCLIV_003870_[Neospora_caninum_Liverpool]	Nuclear	N	N
KWMTBOMO06450	18.0087	35.836	0.992714	0.0001	0.02509	Down	Involved in the recognition of invading micro-organisms. Binds specifically to beta-1,3-glucan and activates the phenoloxidase cascade (By similarity).	Cytoplasmic	Y	N
KWMTBOMO06689	0	1.6579	inf	5e-05	0.0135622	Down	cuticular_protein_hypothetical_15_precursor_[Bombyx_mori]	PlasmaMembrane	Y	Y
KWMTBOMO06690	0	1.17704	inf	5e-05	0.0135622	Down	cuticular_protein_hypothetical_14_precursor_[Bombyx_mori]	PlasmaMembrane	Y	Y
KWMTBOMO06574	5.17785	10.6409	1.03919	0.0001	0.02509	Down	PREDICTED:_ethanolamine-phosphate_cytidylyltransferase_isoform_X3_[Papilio_xuthus]	Cytoplasmic	N	N
KWMTBOMO06672	0	1.20077	inf	5e-05	0.0135622	Down	cuticular_protein_hypothetical_26_precursor_[Bombyx_mori]	PlasmaMembrane	Y	Y
KWMTBOMO07068	0.95186	6.82363	2.84172	5e-05	0.0135622	Down	Lysozymes have primarily a bacteriolytic function; those in tissues and body fluids are associated with the monocyte-macrophage system and enhance the activity of immunoagents.	Extracellular	Y	N
KWMTBOMO07140	24.1795	54.4521	1.1712	5e-05	0.0135622	Down	PREDICTED:_argonaute_2_isoform_X1_[Bombyx_mori]	Nuclear	N	N
KWMTBOMO08181	1.81831	6.52525	1.84344	5e-05	0.0135622	Down	PREDICTED:_carboxypeptidase_B-like_[Amyelois_transitella]	PlasmaMembrane	Y	N
KWMTBOMO09320	0	3.19722	inf	5e-05	0.0135622	Down	Tubulin is the major constituent of microtubules. It binds two moles of GTP, one at an exchangeable site on the beta chain and one at a non-exchangeable site on the alpha chain.	Cytoplasmic	N	N
KWMTBOMO09262	29.5298	163.177	2.46619	5e-05	0.0135622	Down	NA	Nuclear	N	N
KWMTBOMO10273	0	1.13617	inf	5e-05	0.0135622	Down	diapause_associated_protein_2_[Antheraea_pernyi]	PlasmaMembrane	Y	N
KWMTBOMO10956	0.945176	3.21311	1.76531	5e-05	0.0135622	Down	consensus disorder prediction	Nuclear	N	N
KWMTBOMO11635	71.7911	178.853	1.3169	5e-05	0.0135622	Down	PREDICTED:_actin_cytoskeleton-regulatory_complex_protein_PAN1_[Bombyx_mori]	PlasmaMembrane	Y	N
KWMTBOMO11637	52.3482	153.576	1.55274	5e-05	0.0135622	Down	PREDICTED:_actin_cytoskeleton-regulatory_complex_protein_PAN1_[Bombyx_mori]	PlasmaMembrane	Y	N
KWMTBOMO11638	14.3504	184.882	3.68745	5e-05	0.0135622	Down	putative_cuticle_protein_CPH45_precursor_[Bombyx_mori]	PlasmaMembrane	Y	N
KWMTBOMO12431	3.41126	24.3954	2.83823	5e-05	0.0135622	Down	hypothetical_protein_KGM_05523_[Danaus_plexippus]	Cytoplasmic	N	N
KWMTBOMO13329	0	0.478814	inf	5e-05	0.0135622	Down	Tubulin is the major constituent of microtubules. It binds two moles of GTP, one at an exchangeable site on the beta chain and one at a non-exchangeable site on the alpha chain.	Cytoplasmic	N	N
KWMTBOMO13811	0	0.952831	inf	5e-05	0.0135622	Down	AF098304_1_hemolymph_juvenile_hormone_binding_protein_precursor_[Bombyx_mori]	Extracellular	Y	N
KWMTBOMO14317	0.144881	1.50557	3.37737	5e-05	0.0135622	Down	C:integral component of membrane	Extracellular	Y	N
KWMTBOMO14318	0.144881	1.50557	3.37737	5e-05	0.0135622	Down	Isoform B is required for eye pigment production, Isoform C may be required for normal embryonic development and segment pattern formation.	Mitochondrial	N	N
KWMTBOMO15898	6.99564	17.5348	1.3257	5e-05	0.0135622	Down	PREDICTED:_sporozoite_surface_protein_2-like_[Bombyx_mori]	Nuclear	Y	N
KWMTBOMO16009	0	0.525824	inf	5e-05	0.0135622	Down	Tubulin is the major constituent of microtubules. It binds two moles of GTP, one at an exchangeable site on the beta chain and one at a non-exchangeable site on the alpha chain.	Cytoplasmic	N	N
KWMTBOMO16379	0	0.982387	inf	5e-05	0.0135622	Down	gloverin-like_protein_3_[Bombyx_mori]	Extracellular	Y	N
KWMTBOMO16169	25.7803	55.4377	1.1046	0.00015	0.0367171	Down	P:regulation of cell cycle	Extracellular	N	N
KWMTBOMO02265	0	2.48557	inf	5e-05	0.0135622	Down	cuticular_protein_RR-2_motif_59_precursor_[Bombyx_mori]	PlasmaMembrane	Y	N
KWMTBOMO02681	0	1.79207	inf	5e-05	0.0135622	Down	consensus disorder prediction	Nuclear	N	N
KWMTBOMO03772	107.407	257.587	1.26196	5e-05	0.0135622	Down	PREDICTED:_trypsin-like_serine_protease_isoform_X1_[Bombyx_mori]	Extracellular	Y	N
KWMTBOMO04133	0.860249	3.08775	1.84373	5e-05	0.0135622	Down	PREDICTED:_protein_abrupt_[Papilio_xuthus]	Nuclear	N	N
KWMTBOMO04891	9.72355	26.0876	1.42381	5e-05	0.0135622	Down	aminopeptidase_N-3_[Bombyx_mori]	PlasmaMembrane	Y	Y
Note: 'Location', 'Signal peptides' and 'Transmembrane' are predicted based on SGID.

## Sheet: S7
Table S7. DEGs between solitary and group-living silkworms in the cuticle.
Gene	Solitary	Group	LogFC	P-value	Adjusted P-value	Regulation	Function	Location	Signal peptides	Transmembrane
KWMTBOMO00268	298.142	139.988	-1.0907	0.00015	0.0205152	Up	Insulin decreases blood glucose concentration. It increases cell permeability to monosaccharides, amino acids and fatty acids. It accelerates glycolysis, the pentose phosphate cycle, and glycogen synthesis in liver.	Extracellular	Y	N
KWMTBOMO06152	160.1	70.3536	-1.18628	5e-05	0.00849621	Up	Tautomerization of L-dopachrome with decarboxylation to give 5,6-dihydroxyindole (DHI). Also catalyzes the tautomerization of the methyl ester of L-dopachrome and dopamine chrome. May play a role in melanization reactions during late pupal and adult stages. May play a role in melanization reactions during larval and early pupal stages.	PlasmaMembrane	Y	N
KWMTBOMO09374	88.8602	46.7342	-0.92706	0.0004	0.0435534	Up	C:integral component of membrane	Mitochondrial	N	Y
KWMTBOMO09718	1.4891	0	Inf	5e-05	0.00849621	Up	fatty_acid_binding_protein_[Bombyx_mori]	Cytoplasmic	N	N
KWMTBOMO10314	12.9144	3.35911	-1.94283	5e-05	0.00849621	Up	C:extracellular region	PlasmaMembrane	N	N
KWMTBOMO10697	576.893	225.864	-1.35285	5e-05	0.00849621	Up	cuticular_protein_glycine-rich_6_precursor_[Bombyx_mori]	Nuclear	Y	Y
KWMTBOMO11223	262.135	125.202	-1.06605	5e-05	0.00849621	Up	Component of the pupal abdominal endocuticle. May have important role in the pharate pupal cuticle structure.	Extracellular	Y	N
KWMTBOMO12406	35.4232	7.28875	-2.28095	5e-05	0.00849621	Up	PREDICTED:_serine_protease_snake-like_[Bombyx_mori]	Extracellular	Y	N
KWMTBOMO13014	16.2735	3.69201	-2.14005	5e-05	0.00849621	Up	cuticular_protein_RR-2_motif_87_precursor_[Bombyx_mori]	Extracellular	Y	N
KWMTBOMO13018	80.9833	30.6461	-1.40192	5e-05	0.00849621	Up	_putative_cuticle_protein_[Bombyx_mori]	PlasmaMembrane	Y	N
KWMTBOMO13165	4660.59	1798.65	-1.3736	5e-05	0.00849621	Up	cuticular_protein_RR-1_motif_23_precursor_[Bombyx_mori]	Extracellular	Y	N
KWMTBOMO13992	2993.39	768.377	-1.9619	5e-05	0.00849621	Up	sex-specific_storage-protein_1_precursor_[Bombyx_mori]	Extracellular	Y	Y
KWMTBOMO14261	46.9585	11.0072	-2.09294	5e-05	0.00849621	Up	NA	PlasmaMembrane	N	Y
KWMTBOMO01542	3458.73	1507.77	-1.19783	0.0001	0.0155764	Up	fungal_protease_inhibitor_[Bombyx_mori]	PlasmaMembrane	Y	N
KWMTBOMO02265	2564.9	1218.22	-1.07413	0.0002	0.0260814	Up	cuticular_protein_RR-2_motif_59_precursor_[Bombyx_mori]	PlasmaMembrane	Y	N
KWMTBOMO02461	94.1467	35.6917	-1.39932	5e-05	0.00849621	Up	PREDICTED:_glycine-rich_cell_wall_structural_protein-like_[Bombyx_mori]	Nuclear	Y	Y
KWMTBOMO04935	21.3013	10.3971	-1.03476	0.0004	0.0435534	Up	CRAL-TRIO_domain-containing_protein?_partial_[Manduca_sexta]	Nuclear	N	N
KWMTBOMO04936	21.3013	10.3971	-1.03476	0.0004	0.0435534	Up	PREDICTED:_fatty-acid_amide_hydrolase_2-A-like_isoform_X3_[Bombyx_mori]	Mitochondrial	N	N
KWMTBOMO00039	68.3495	146.157	1.09652	0.00035	0.0400536	Down	Pro-inflammatory cytokine. Involved in the innate immune response to bacterial pathogens. The expression of MIF at sites of inflammation suggests a role as mediator in regulating the function of macrophages in host defense. Counteracts the anti-inflammatory activity of glucocorticoids. Has phenylpyruvate tautomerase and dopachrome tautomerase activity (in vitro), but the physiological substrate i…	Mitochondrial	N	N
KWMTBOMO00334	3.27652	6.81247	1.05601	0.0001	0.0155764	Down	PREDICTED:_amyloid_beta_A4_precursor_protein-binding_family_B_member_1-interacting_protein_isoform_X2_[Amyelois_transitella]	Nuclear	N	N
KWMTBOMO00581	1.57039	5.05596	1.68686	0.00015	0.0205152	Down	PREDICTED:_alpha-tocopherol_transfer_protein-like_[Amyelois_transitella]	Mitochondrial	N	N
KWMTBOMO00646	3.72755	8.54245	1.19642	0.0001	0.0155764	Down	The H protein shuttles the methylamine group of glycine from the P protein to the T protein.	Mitochondrial	N	N
KWMTBOMO05616	93.2583	207.438	1.15338	5e-05	0.00849621	Down	lebocin-3_precursor_[Bombyx_mori]	Extracellular	Y	N
KWMTBOMO05498	96.1528	213.043	1.14775	5e-05	0.00849621	Down	PREDICTED:_C-type_lectin_11_isoform_X1_[Bombyx_mori]	Extracellular	Y	N
KWMTBOMO05499	96.1528	213.043	1.14775	5e-05	0.00849621	Down	PREDICTED:_serine/threonine-protein_kinase_NLK_isoform_X1_[Amyelois_transitella]	Nuclear	N	N
KWMTBOMO05501	96.1528	213.043	1.14775	5e-05	0.00849621	Down	serine/threonine_kinase_NLK_[Danaus_plexippus]	Nuclear	N	N
KWMTBOMO05728	4.62684	10.406	1.16932	5e-05	0.00849621	Down	PREDICTED:_CAD_protein_isoform_X1_[Amyelois_transitella]	Cytoplasmic	N	N
KWMTBOMO05915	0.380394	1.33104	1.80699	0.00045	0.0480643	Down	PREDICTED:_tetraspanin-4-like_[Papilio_polytes]	PlasmaMembrane	N	Y
KWMTBOMO06428	25.8006	51.0913	0.985672	0.0004	0.0435534	Down	Alanine--glyoxylate_aminotransferase_2?_mitochondrial_[Papilio_xuthus]	Mitochondrial	N	N
KWMTBOMO06932	28.6853	67.9202	1.24353	5e-05	0.00849621	Down	fatty_acid_synthase_2?_partial_[Helicoverpa_assulta]	Nuclear	N	N
KWMTBOMO07178	11.992	39.6602	1.72562	5e-05	0.00849621	Down	O-methyltransferase that transfers a methyl group from S-adenosyl-L-methionine (SAM) to the carboxyl group of juvenile hormone acids to produce active juvenile hormones in the corpora allata, the last step during juvenile hormone biosynthesis (PubMed:18549957). Also able to methylate farnesoate to methyl farnesoate (PubMed:18549957).	Cytoplasmic	N	N
KWMTBOMO07179	11.992	39.6602	1.72562	5e-05	0.00849621	Down	AdoMet_MTases	Nuclear	N	N
KWMTBOMO07701	1.94924	4.22196	1.115	0.0004	0.0435534	Down	PREDICTED:_venom_dipeptidyl_peptidase_4-like_[Bombyx_mori]	PlasmaMembrane	N	N
KWMTBOMO07702	1.94924	4.22196	1.115	0.0004	0.0435534	Down	PREDICTED:_venom_dipeptidyl_peptidase_4-like_[Bombyx_mori]	PlasmaMembrane	N	Y
KWMTBOMO08212	0	1.64967	inf	5e-05	0.00849621	Down	PREDICTED:_cytochrome_b5-like_[Amyelois_transitella]	Cytoplasmic	N	N
KWMTBOMO08261	1.18151	7.61661	2.68852	5e-05	0.00849621	Down	May be involved in the metabolism of insect hormones and in the breakdown of synthetic insecticides.	Mitochondrial	N	N
KWMTBOMO08262	1.18151	7.61661	2.68852	5e-05	0.00849621	Down	PREDICTED:_probable_cytochrome_P450_49a1_[Papilio_xuthus]	Mitochondrial	N	N
KWMTBOMO08444	3.22567	6.69805	1.05415	0.00015	0.0205152	Down	Bifunctional glycosyltransferase with both xylosyltransferase and beta-1,3-glucuronyltransferase activities involved in the biosynthesis of the phosphorylated O-mannosyl trisaccharide (N-acetylgalactosamine-beta-3-N-acetylglucosamine-beta-4-(phosphate-6-)mannose), a carbohydrate structure present in alpha-dystroglycan (DAG1) (PubMed:22223806). Phosphorylated O-mannosyl trisaccharid is required fo…	PlasmaMembrane	N	N
KWMTBOMO08445	3.22567	6.69805	1.05415	0.00015	0.0205152	Down	Required, together with Ssk and Tsp2A, for the proper organization of smooth septate junctions (sSJs), probably by mediating cell adhesion via its homophilic interaction (PubMed:22854041, PubMed:26848177). Also required for the correct subcellular localization of several sSJ components, such as Ssk, cora and l(2)gl, and for the barrier function of the midgut epithelium (PubMed:22854041). Required…	PlasmaMembrane	N	Y
KWMTBOMO08446	3.22567	6.69805	1.05415	0.00015	0.0205152	Down	May be required for the proper organization of smooth septate junctions and for the barrier function of the midgut epithelium.	Nuclear	Y	N
KWMTBOMO09319	0	0.945739	inf	5e-05	0.00849621	Down	Tubulin is the major constituent of microtubules. It binds two moles of GTP, one at an exchangeable site on the beta chain and one at a non-exchangeable site on the alpha chain.	Cytoplasmic	N	N
KWMTBOMO08827	8.60964	20.1128	1.22409	0.0001	0.0155764	Down	PREDICTED:_zinc_finger_protein_GLIS3-like_[Amyelois_transitella]	Nuclear	N	N
KWMTBOMO09216	42.4129	81.8677	0.948793	0.00025	0.0301478	Down	F:lipid binding	Cytoplasmic	Y	N
KWMTBOMO09342	170.61	335.141	0.974069	0.00015	0.0205152	Down	carboxypeptidase_inhibitor_precursor_[Bombyx_mori]	Extracellular	Y	N
KWMTBOMO09651	6.4511	24.3501	1.91631	5e-05	0.00849621	Down	peptidoglycan_recognition_protein_S6_precursor_[Bombyx_mori]	Mitochondrial	N	N
KWMTBOMO09867	13.0314	29.1105	1.15955	5e-05	0.00849621	Down	Uncharacterized_protein_OBRU01_13232_[Operophtera_brumata]	Cytoplasmic	N	N
KWMTBOMO10006	24.0707	55.5357	1.20614	5e-05	0.00849621	Down	triacylglycerol_lipase_[Bombyx_mori]	PlasmaMembrane	Y	N
KWMTBOMO10489	57.9842	130.616	1.1716	5e-05	0.00849621	Down	Involved in pyrimidine base degradation. Catalyzes the reduction of uracil and thymine.	Cytoplasmic	N	N
KWMTBOMO10603	13.8133	29.969	1.11741	5e-05	0.00849621	Down	cytochrome_P450_9G3_[Bombyx_mori]	Cytoplasmic	N	Y
KWMTBOMO11313	43.7144	83.1724	0.927997	0.0003	0.0357926	Down	Contributes to tetrahydrofolate metabolism. Helps regulate carbon flow through the folate-dependent one-carbon metabolic network that supplies carbon for the biosynthesis of purines, thymidine and amino acids. Catalyzes the irreversible conversion of 5-formyltetrahydrofolate (5-CHO-H(4)PteGlu) to yield 5,10-methenyltetrahydrofolate (By similarity).	Mitochondrial	N	N
KWMTBOMO11541	996.473	2473.74	1.31179	5e-05	0.00849621	Down	chemosensory_protein_8_precursor_[Bombyx_mori]	Extracellular	Y	N
KWMTBOMO11551	372.962	797.765	1.09694	5e-05	0.00849621	Down	PREDICTED:_holotricin-3_[Bombyx_mori]	Nuclear	Y	Y
KWMTBOMO11379	89.4262	182.077	1.02578	0.0002	0.0260814	Down	cuticular_protein_glycine-rich_18_precursor_[Bombyx_mori]	Nuclear	Y	N
KWMTBOMO11696	3.66485	8.15364	1.15369	5e-05	0.00849621	Down	Responsible for guiding the germ cells early in the process of migration from the lumen of the developing gut towards the overlying mesoderm, where the germ cells enter the gonads. May be involved in lipid metabolism.	PlasmaMembrane	N	Y
KWMTBOMO11817	7.4273	50.7469	2.77241	5e-05	0.00849621	Down	NA	Mitochondrial	N	N
KWMTBOMO11818	7.4273	50.7469	2.77241	5e-05	0.00849621	Down	reverse_transcriptase_[Bombyx_mori]	PlasmaMembrane	N	N
KWMTBOMO11953	4.32529	13.0389	1.59195	0.0001	0.0155764	Down	microvitellogenin-like_precursor_[Bombyx_mori]	Nuclear	N	N
KWMTBOMO12116	5.23143	10.1352	0.954095	0.00015	0.0205152	Down	PREDICTED:_transmembrane_protein_68_isoform_X1_[Bombyx_mori]	PlasmaMembrane	N	Y
KWMTBOMO12183	5.6059	15.7306	1.48856	5e-05	0.00849621	Down	antennal_esterase_precursor_[Bombyx_mori]	Cytoplasmic	N	N
KWMTBOMO13007	0	0.455138	inf	5e-05	0.00849621	Down	cuticular_protein_RR-2_motif_92_precursor_[Bombyx_mori]	PlasmaMembrane	N	N
KWMTBOMO12899	0.752306	4.6697	2.63394	5e-05	0.00849621	Down	heat_shock_protein_68_[Bombyx_mori]	Cytoplasmic	N	N
KWMTBOMO13751	69.6724	200.367	1.52399	5e-05	0.00849621	Down	consensus disorder prediction	Nuclear	Y	N
KWMTBOMO13533	3.37948	14.7767	2.12845	5e-05	0.00849621	Down	C:integral component of membrane	Extracellular	N	Y
KWMTBOMO13893	12.3747	30.6067	1.30645	0.00025	0.0301478	Down	odorant-binding_protein_11_[Cnaphalocrocis_medinalis]	Extracellular	N	N
KWMTBOMO14109	50.1489	131.657	1.39249	5e-05	0.00849621	Down	PREDICTED:_glucose-1-phosphatase-like_[Papilio_machaon]	Cytoplasmic	Y	N
KWMTBOMO14334	26.7687	67.0438	1.32456	5e-05	0.00849621	Down	NA	Nuclear	N	N
KWMTBOMO14677	0.132519	1.04425	2.97819	0.00045	0.0480643	Down	A short-range repellent, controlling axon crossing of the midline and a long-range chemorepellent, controlling mesoderm migration and patterning away from the midline. May interact with extracellular matrix molecules. Repulsive ligand for the guidance receptor roundabout (robo) and prevents inappropriate midline crossing by Robo-expressing axons.	Mitochondrial	N	N
KWMTBOMO14678	0.132519	1.04425	2.97819	0.00045	0.0480643	Down	A short-range repellent, controlling axon crossing of the midline and a long-range chemorepellent, controlling mesoderm migration and patterning away from the midline. May interact with extracellular matrix molecules. Repulsive ligand for the guidance receptor roundabout (robo) and prevents inappropriate midline crossing by Robo-expressing axons.	Extracellular	N	N
KWMTBOMO14536	7.68613	19.8471	1.3686	5e-05	0.00849621	Down	ATP-citrate synthase is the primary enzyme responsible for the synthesis of cytosolic acetyl-CoA in many tissues.	Cytoplasmic	N	N
KWMTBOMO15205	143.42	304.862	1.08791	0.00035	0.0400536	Down	PREDICTED:_C-1-tetrahydrofolate_synthase?_cytoplasmic_isoform_X2_[Bombyx_mori]	Mitochondrial	N	N
KWMTBOMO15666	31.0487	60.2648	0.956783	0.00025	0.0301478	Down	C-type_lectin_19_precursor_[Bombyx_mori]	PlasmaMembrane	Y	N
KWMTBOMO15694	3.67579	12.0493	1.71282	0.00015	0.0205152	Down	F:oxidoreductase activity, acting on paired donors, with incorporation or reduction of molecular oxy	Cytoplasmic	N	N
KWMTBOMO15985	17.8987	36.2958	1.01995	5e-05	0.00849621	Down	PREDICTED:_fibulin-1-like_[Bombyx_mori]	Extracellular	Y	N
KWMTBOMO16293	5.47631	17.1154	1.64402	5e-05	0.00849621	Down	O-methyltransferase that transfers a methyl group from S-adenosyl-L-methionine (SAM) to the carboxyl group of juvenile hormone acids to produce active juvenile hormones in the corpora allata, the last step during juvenile hormone biosynthesis (PubMed:18549957). Also able to methylate farnesoate to methyl farnesoate (PubMed:18549957).	Nuclear	N	N
KWMTBOMO16333	56.9758	113.798	0.998048	0.0002	0.0260814	Down	putative_fatbody_protein_3Rev-G1_precursor_[Bombyx_mori]	Extracellular	Y	N
KWMTBOMO16379	33.1927	124.792	1.91059	5e-05	0.00849621	Down	gloverin-like_protein_3_[Bombyx_mori]	Extracellular	Y	N
KWMTBOMO16428	2.56319	9.15	1.83583	5e-05	0.00849621	Down	gloverin_4_precursor_[Bombyx_mori]	Nuclear	N	N
KWMTBOMO01086	24.7223	60.8386	1.29917	5e-05	0.00849621	Down	PREDICTED:_S-adenosylmethionine_decarboxylase_proenzyme_[Bombyx_mori]	Mitochondrial	N	N
KWMTBOMO01268	3.62701	32.077	3.14469	5e-05	0.00849621	Down	NA	Extracellular	Y	N
KWMTBOMO01582	25.7918	64.5469	1.32344	5e-05	0.00849621	Down	juvenile_hormone_diol_kinase_[Manduca_sexta]	Cytoplasmic	N	N
KWMTBOMO02157	10.1387	28.3116	1.48152	5e-05	0.00849621	Down	Cytochrome_b5_[Operophtera_brumata]	Cytoplasmic	N	N
KWMTBOMO01738	5.03243	16.7781	1.73725	0.0002	0.0260814	Down	P:response to symbiotic bacterium	Cytoplasmic	N	N
KWMTBOMO01814	14.0275	39.1425	1.48048	0.00015	0.0205152	Down	Catalyzes the oxidation of uric acid to 5-hydroxyisourate, which is further processed to form (S)-allantoin.	Nuclear	N	N
KWMTBOMO02681	0	0.579377	inf	5e-05	0.00849621	Down	consensus disorder prediction	Nuclear	N	N
KWMTBOMO02880	58.7795	158.751	1.43338	5e-05	0.00849621	Down	cystathionine_gamma-lyase_[Bombyx_mori]	Cytoplasmic	N	N
KWMTBOMO02906	26.2294	56.0656	1.09593	5e-05	0.00849621	Down	PREDICTED:_lipoyltransferase_1?_mitochondrial_isoform_X1_[Papilio_polytes]	Mitochondrial	N	N
KWMTBOMO03154	1.20093	4.29456	1.83836	5e-05	0.00849621	Down	PREDICTED:_scavenger_receptor_class_B_member_1-like_isoform_X1_[Bombyx_mori]	PlasmaMembrane	N	Y
KWMTBOMO03191	0	0.670207	inf	0.00025	0.0301478	Down	hypothetical_protein_RR46_03886_[Papilio_xuthus]	Nuclear	N	N
KWMTBOMO03710	9.49228	51.1446	2.42976	5e-05	0.00849621	Down	Has antibacterial activity against both Gram-positive and Gram-negative bacteria.	Mitochondrial	Y	N
KWMTBOMO03246	5.05781	9.43276	0.899167	0.0004	0.0435534	Down	PREDICTED:_xylulose_kinase_isoform_X2_[Amyelois_transitella]	PlasmaMembrane	N	N
KWMTBOMO03709	64.9314	176.192	1.44016	5e-05	0.00849621	Down	Has antibacterial activity against both Gram-positive and Gram-negative bacteria.	Mitochondrial	Y	N
KWMTBOMO03739	2.39015	7.69696	1.68719	0.00015	0.0205152	Down	C:integral component of membrane	Cytoplasmic	Y	N
KWMTBOMO05158	30.1756	70.1237	1.21652	5e-05	0.00849621	Down	This venom insulin facilitates prey capture by rapidly inducing hypoglycemic shock. Intraperitoneal injection of this peptide into zebrafish lowers blood glucose with the same potency than human insulin. In vivo, when applied to water, this peptide reduces overall locomotor activity of zebrafish larvae, observed as a significant decrease in the percentage of time spent swimming and movement frequ…	Extracellular	Y	N
KWMTBOMO05182	31.418	63.4668	1.01441	0.00035	0.0400536	Down	PREDICTED:_cytochrome_b5-related_protein-like_[Papilio_machaon]	PlasmaMembrane	N	Y
KWMTBOMO05383	1.68699	3.83636	1.18528	0.00025	0.0301478	Down	PREDICTED:_zinc_finger_protein_1_isoform_X2_[Bombyx_mori]	Nuclear	N	N
KWMTBOMO05344	183.054	396.248	1.11413	5e-05	0.00849621	Down	cuticular_protein_glycine-rich_13_precursor_[Bombyx_mori]	PlasmaMembrane	Y	N
Note: 'Location', 'Signal peptides' and 'Transmembrane' are predicted based on SGID.

## Sheet: S8
Table S8. DEmiRNAs between solitary and group-living silkworms in the brain.
ID	Solitary	Group-living	log2FoldChange	Adjusted P-value	Regulation
bmomiR100	115723	31587.5	1.87326	1.72426e-12	up
bmomiR27575p	11004.6	3705.81	1.57031	1.03789e-07	up
bmomiR9275p	71932	22498.5	1.67682	2.61691e-07	up
bmomiR64985p	491.077	120.483	2.0266	2.7662e-06	up
bmomiR64975p	1061.1	323.639	1.71291	6.12145e-06	up
bmomiR3755p	325.088	71.9322	2.17659	2.0961e-05	up
bmomiR263a5p	30682.9	12079.4	1.3449	2.35828e-05	up
bmomiR2791	146.183	36.9389	1.98714	0.0330722	up
bmomiR27605p	230.224	853.496	-1.88999	1.38192e-05	down
bmomiR2835p	259.537	693.294	-1.41738	0.000235409	down
bmomiR27875p	90.9528	394.805	-2.11751	0.0010991	down
bmomiR3001	424.861	1313.17	-1.62776	0.0020628	down

## Sheet: S9
Table S9. DEmiRNAs between solitary and group-living silkworms in the body with brain excised.
ID	baseMean	log2FoldChange	lfcSE	stat	P-value	Adjusted P-value
bmomiR2778b5p	48.2055	-8.90769	2.04689	-4.35183	1.35007e-05	0.000769541
bmomiR2778c5p	48.2055	-8.90769	2.04689	-4.35183	1.35007e-05	0.000769541
bmomiR2778d5p	48.2055	-8.90769	2.04689	-4.35183	1.35007e-05	0.000769541
bmomiR2780b	44.5608	-8.7946	2.10599	-4.17599	2.96692e-05	0.00126836
bmomiR3399	45.4039	-8.82012	2.18638	-4.03413	5.48056e-05	0.00135841
bmomiR3345	39.5534	-8.62264	2.14232	-4.02491	5.69974e-05	0.00135841
bmomiR1845p	41.2136	-8.68054	2.15673	-4.02486	5.70088e-05	0.00135841
bmomiR33875p	36.885	-8.52147	2.13078	-3.99922	6.35516e-05	0.00135841
bmomiR27605p	206.874	-3.27983	0.958923	-3.42032	0.000625467	0.0118839
